# Supplementary material
Source: Royal Society of Chemistry journal article supplement (doi:10.1039/d6fo00048g)
Supplement: d6fo00048g1.pdf [file d6fo00048g1.pdf]

## Supplemental information

**Table S1: Specific primers used for RT-PCR**

| Genes          | Primer            | Sequence (5'-3')         |
|----------------|-------------------|--------------------------|
| <i>Creb</i>    | <i>Creb</i> -F    | ACAATGGTACGGATGGGGTA     |
|                | <i>Creb</i> -R    | CTGCTGTCCATCAGTGGTC      |
| <i>Bmal1</i>   | <i>Bmal1</i> -F   | GAACAGCTATCTTCCTCGGACACT |
|                | <i>Bmal1</i> -R   | GGAAGTCCAGTCTTGGCATCA    |
| <i>Clock</i>   | <i>Clock</i> -F   | CCACATGCCTCCCACTTTTC     |
|                | <i>Clock</i> -R   | TGCGGATGAGGCTGGACTA      |
| <i>Per1</i>    | <i>Per1</i> -F    | CTTGATGTGATGGCGTGTGT     |
|                | <i>Per1</i> -R    | AGCTGGGGCAGTTTCCTATT     |
| <i>Per2</i>    | <i>Per2</i> -F    | ATCTCCAGGCGGTGTTGAAG     |
|                | <i>Per2</i> -R    | AGGGTTACGTCTGGGCCTCT     |
| <i>Cry1</i>    | <i>Cry1</i> -F    | TGGCCAAATGGGCAGAAG       |
|                | <i>Cry1</i> -R    | CCCTCCTGACGAAGCTGAGT     |
| <i>Cry2</i>    | <i>Cry2</i> -F    | GCTGGAAGCAGCCGAGGAACC    |
|                | <i>Cry2</i> -R    | GGGCTTTGCTCACGGAGCGA     |
| <i>β-actin</i> | <i>β-actin</i> -F | CGGTTCCGATGCCCTGAGGCTCTT |
|                | <i>β-actin</i> -R | CGTCACACTTCATGATGGAATTGA |

(A)

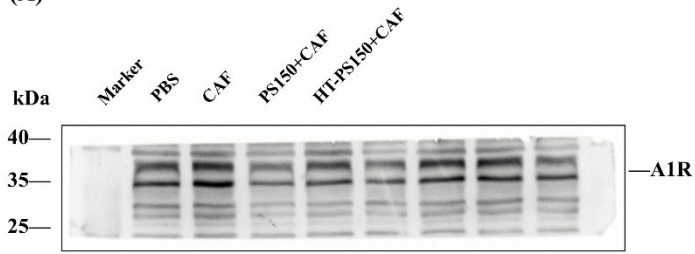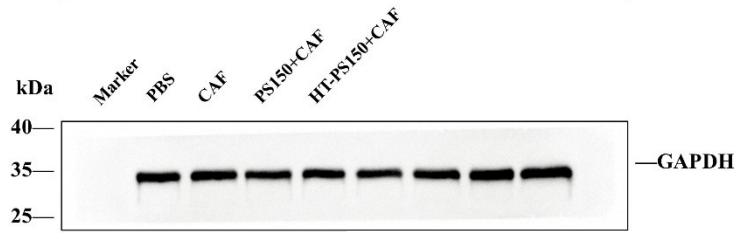

(B)

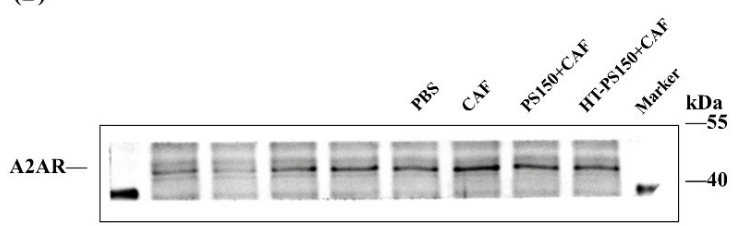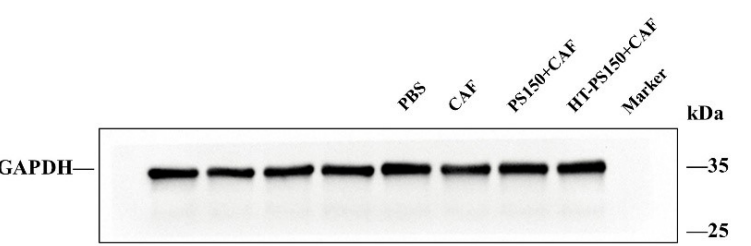

(C)

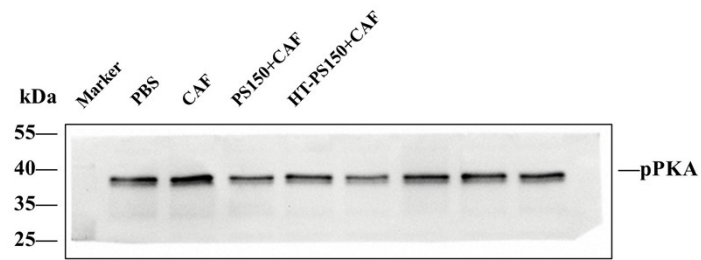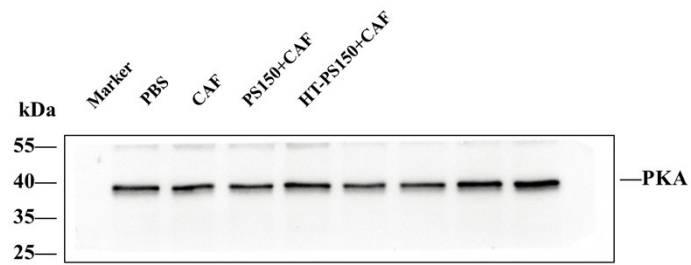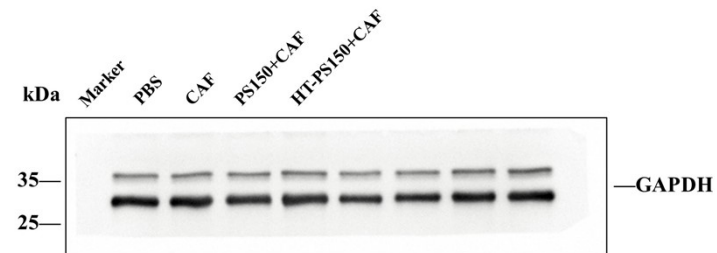

**Fig. S1** Original membrane and immunoblot images corresponding to Fig. 2A-C. PVDF membranes were cut into sections prior to antibody incubation. The images represent original scans of these membrane sections without post-acquisition cropping or manipulation. Some lanes appear blank because they were not included in the analysis or main figures.

(A)

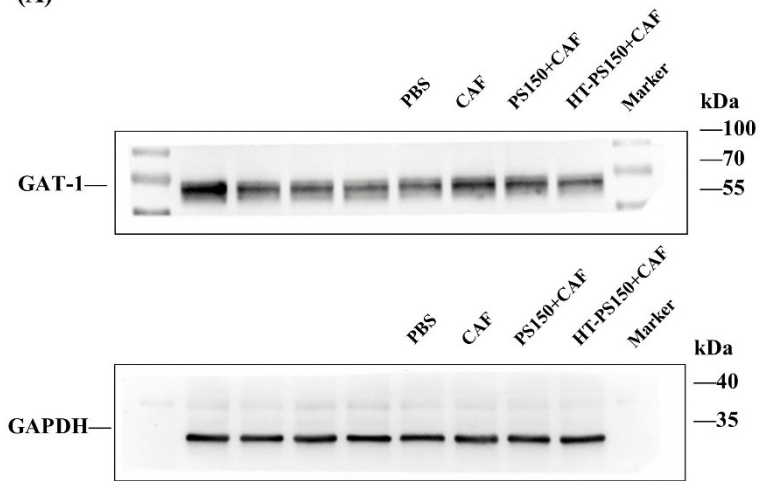

(B)

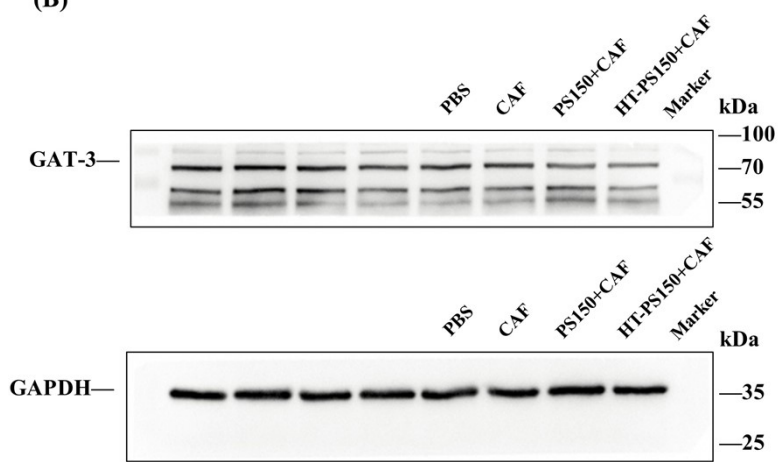

(C)

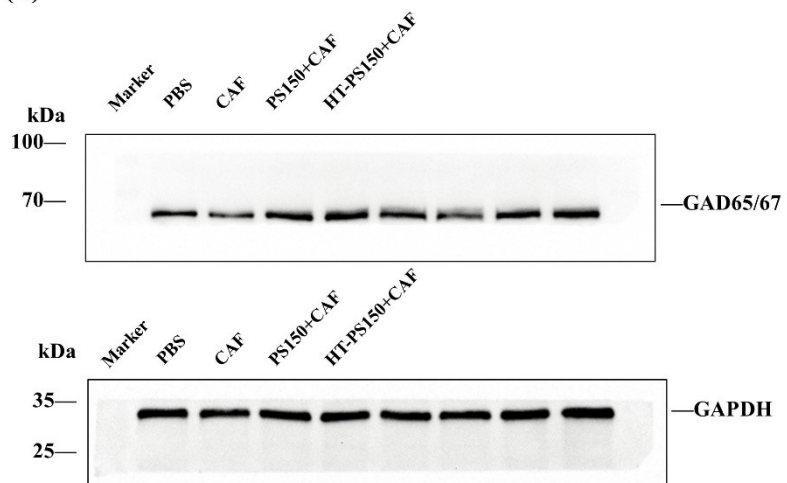

**Fig. S2** Original membrane and immunoblot images corresponding to Fig. 4A-C. PVDF membranes were cut into sections prior to antibody incubation. The images represent original scans of these membrane sections without post-acquisition cropping or manipulation. Some lanes appear blank because they were not included in the analysis or main figures.

(A)

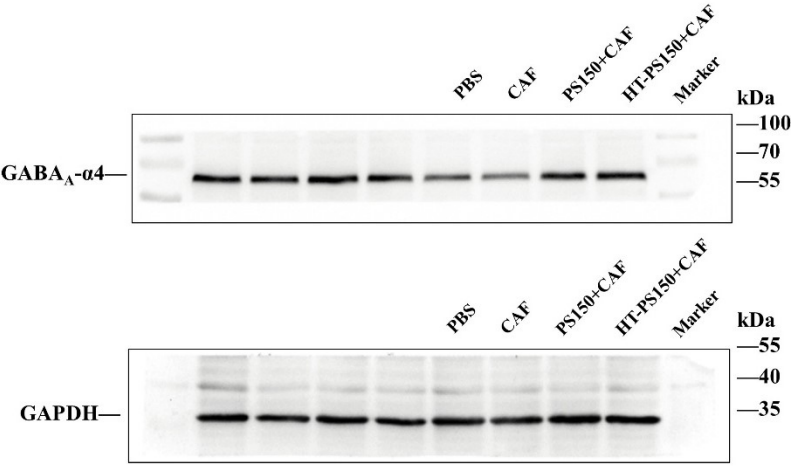

(B)

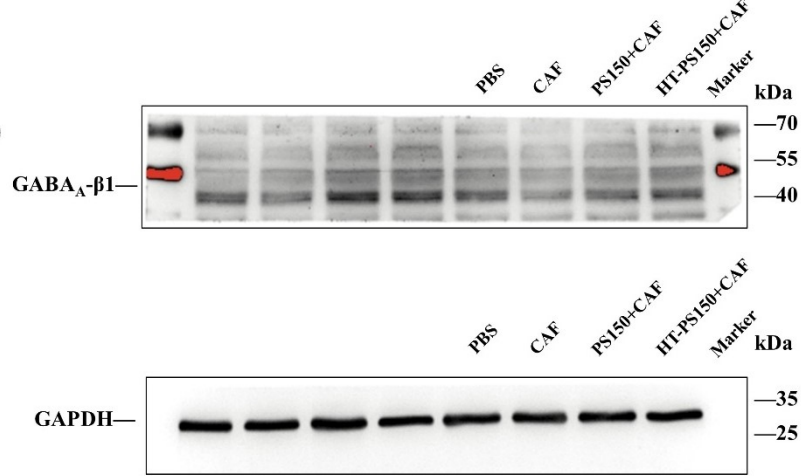

(C)

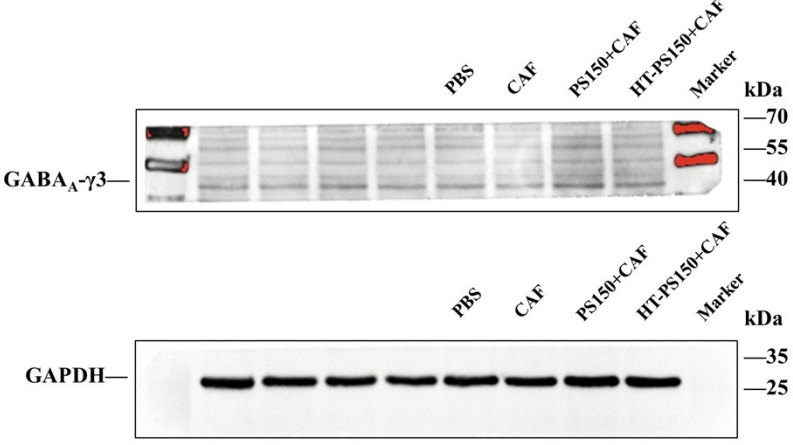

**Fig. S3** Original membrane and immunoblot images corresponding to Fig. 5A-C. PVDF membranes were cut into sections prior to antibody incubation. The images represent original scans of these membrane sections without post-acquisition cropping or manipulation. Some lanes appear blank because they were not included in the analysis or main figures.

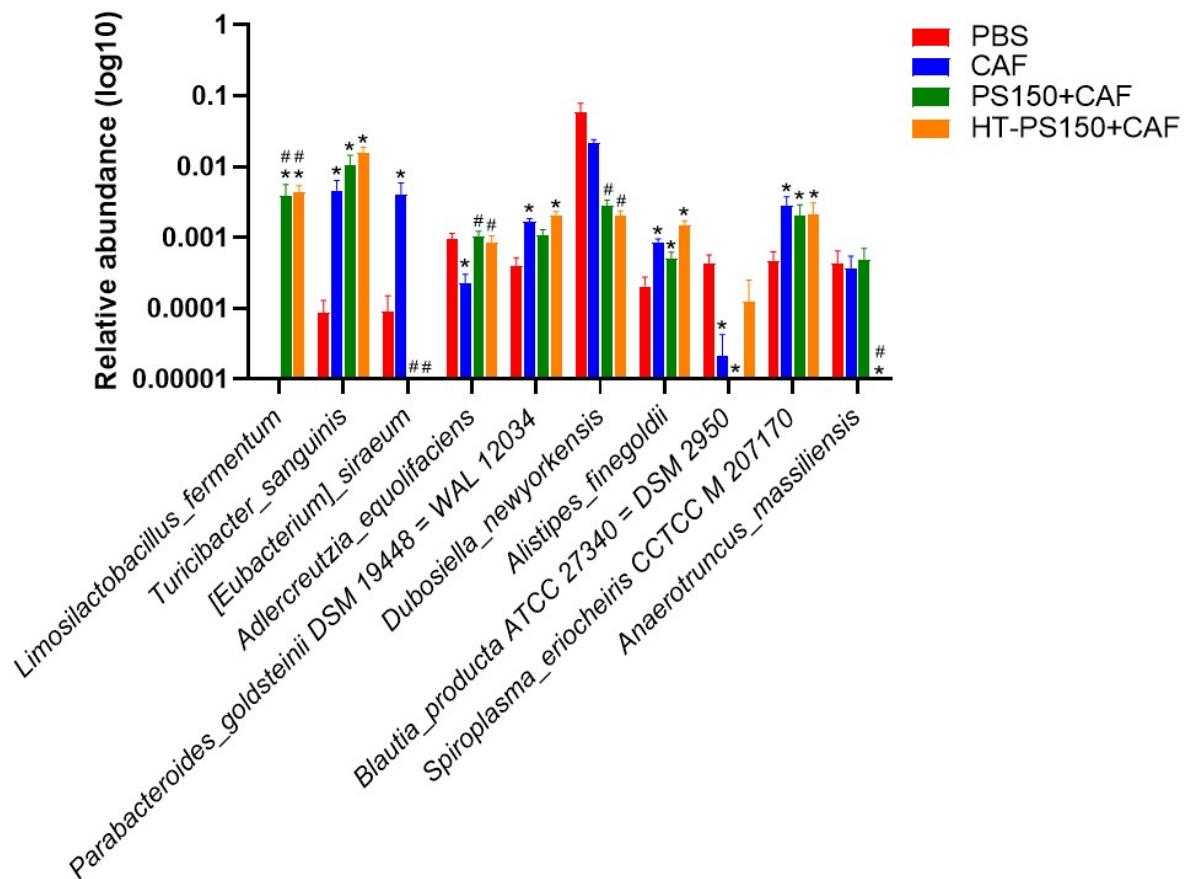

**Fig. S4** Relative abundance of the top 10 species showing the most significant differences among groups. Statistical analysis was performed using the Kruskal–Wallis test. \* $p < 0.05$  vs. PBS; # $p < 0.05$  vs. CAF.
